# Supplementary material
Source: PubMed Central journal article supplement (PMC2930582)
Supplement: 1009241107_pnas.201009241SI.pdf [file 1009241107_pnas.201009241SI.pdf]

# Supporting Information

Dunse et al. 10.1073/pnas.1009241107

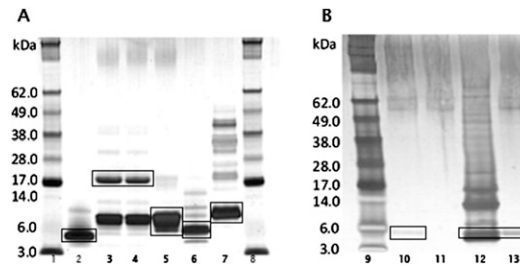

**Fig. S1.** Impurities in commercial preparations of proteinase inhibitors (PIs). PIs (~5  $\mu$ g) were separated on 4–12% (wt/vol) NuPage Bis-Tris SDS-polyacrylamide gels (Invitrogen) and silver stained. PIs of interest are boxed. (A) SeeBlue Plus2 protein standards (Invitrogen) (1 and 8); *Nicotiana glauca* proteinase inhibitor (NaPI) (6 kDa) purified from stigmas (2) and commercial preparations of soybean trypsin inhibitor (3 and 4), Bowman-Birk soybean inhibitor (5), bovine pancreatic trypsin inhibitor (6), and lima bean trypsin inhibitor (7) were purchased from Sigma-Aldrich. (B) SeeBlue Plus2 protein standards (Invitrogen) (9) and commercial preparations of potato inhibitor I purchased from Merck (10–13; ~500 ng per lane) showing different concentrations and levels of contamination.

**Table S1. Inhibition of NaPI-resistant chymotrypsin and bovine chymotrypsin by various proteinase inhibitors**

| Inhibitor                                | IC <sub>50</sub> ( $\mu$ M) |                        |
|------------------------------------------|-----------------------------|------------------------|
|                                          | NaPI-res<br>chymotrypsin    | Bovine<br>chymotrypsin |
| NaPI                                     | >10                         | 0.04                   |
| Chymostatin                              | 0.004                       | 0.004                  |
| Potato type I inhibitor                  | 0.02                        | 0.12                   |
| Bowman-Birk soybean proteinase inhibitor | 0.24                        | 0.06                   |
| Lima bean trypsin inhibitor              | 3.0                         | 0.2                    |
| Soybean trypsin inhibitor                | 3.4                         | 1.6                    |
| Phenylmethanesulfonyl fluoride           | 33.0                        | 13.0                   |
| Leupeptin                                | 140.0                       | 2400                   |

Comparison of the inhibitory activity of several commercially available proteinase inhibitors and NaPI against a preparation of *Helicoverpa punctigera* gut enzymes that had been enriched for the NaPI-resistant chymotrypsins (NaPI-res) and bovine chymotrypsin was used as the control enzyme.
